# Supplementary material
Source: publisher figshare collection journal article supplement (https://diabetesjournals.figshare.com/ndownloader/files/23173763)

Figure S1. Run chart of depression and diabetes distress screening rates for outpatient diabetes patients aged 13–21 years at Seattle Children's Hospital.

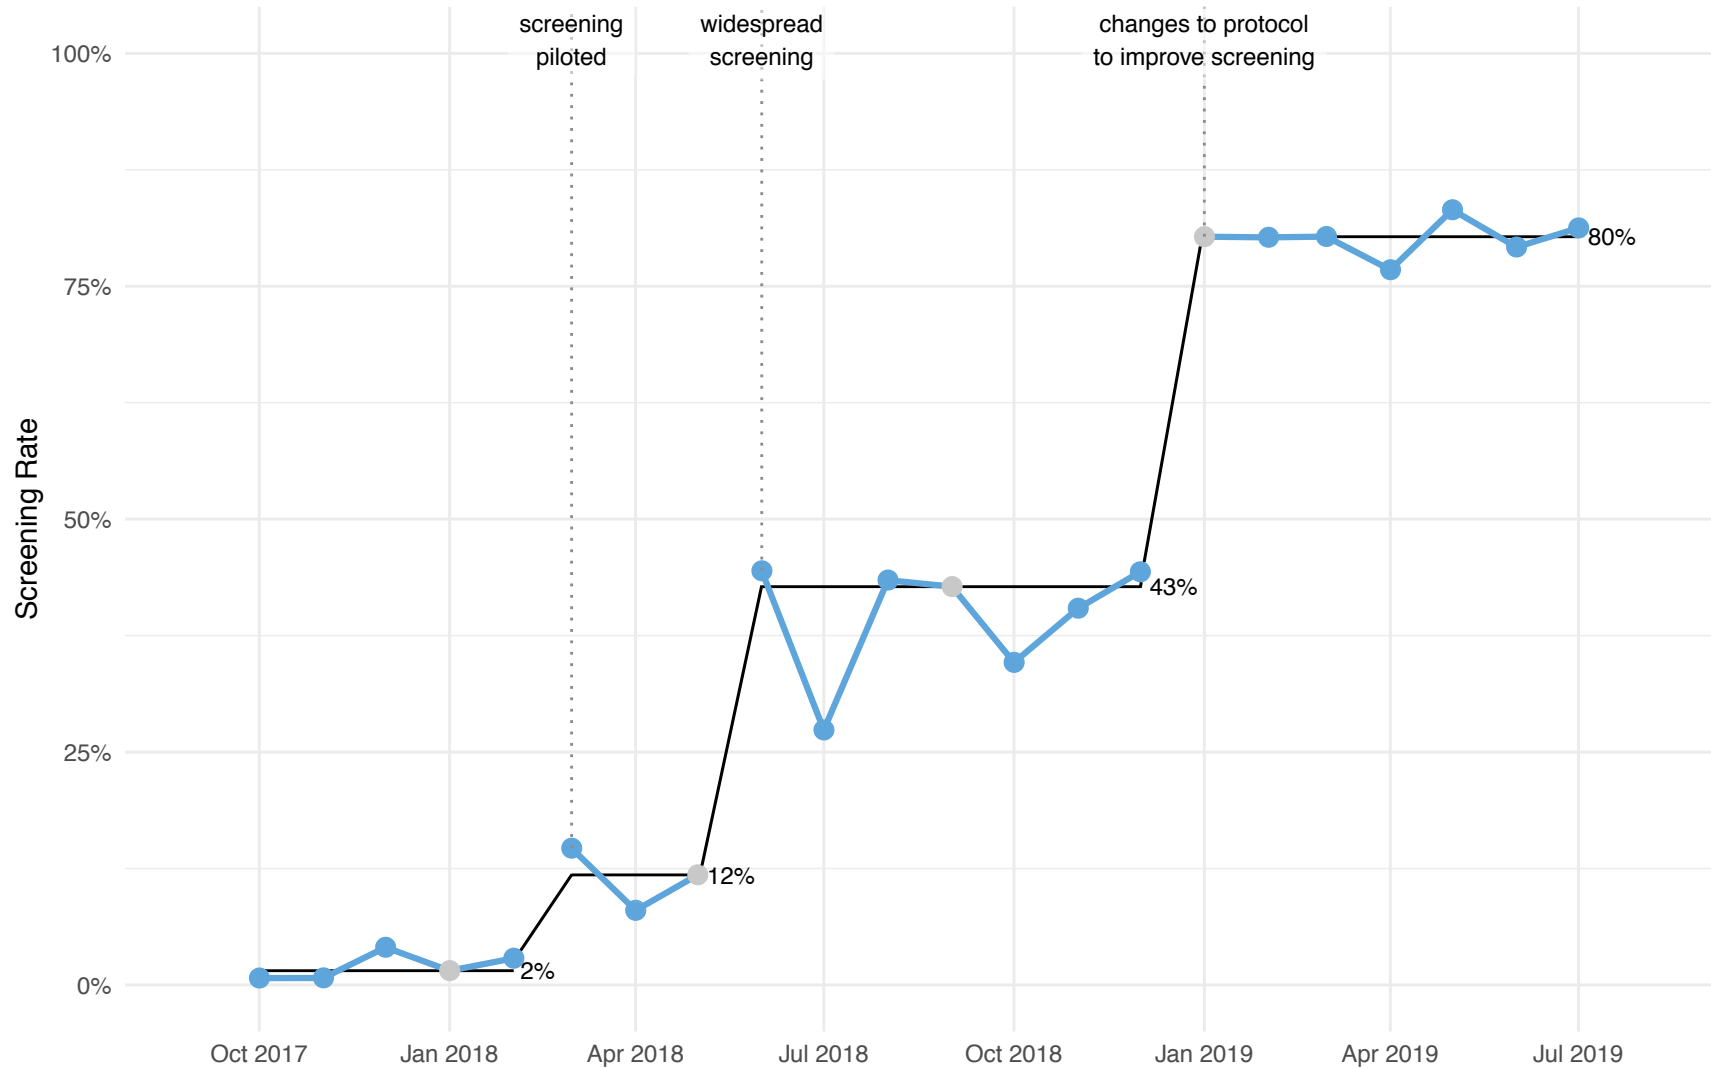

Supplement: Supplementary file 1 [file 23173763]
